# Supplementary material for: Developing a health economic model for Asians with type 2 diabetes based on the Japan Diabetes Complications Study and the Japanese Elderly Diabetes Intervention Trial
Source: PubMed Central journal article supplement — BMJ Open Diabetes Res Care. 2021 Aug 5;9(1):e002177. doi: 10.1136/bmjdrc-2021-002177 (PMC8344269; doi:10.1136/bmjdrc-2021-002177), 2021-08-05
Supplement: bmjdrc-2021-002177supp001.pdf [file bmjdrc-2021-002177supp001.pdf]

## Supplementary information

The survival function at time  $t$  of the Weibull regression models is  $S(t) = \exp\{-\lambda \exp(X\beta) t^\rho\}$ , where  $\lambda$  represents the Weibull scale parameter,  $\rho$  the Weibull shape parameter and  $\beta$  the regression coefficients for the vector of risk factors  $X$ . The statistical outputs of these Weibull equations are shown in Figure S1–Figure S5.

### Figure S1: Statistical output of Weibull equation for CHD

```
. nl (chd_cif = 1- exp(-{lamb=0.0001}*sttime^{rho=1})) if sttime<7.85
(obs = 433)
```

Iteration 0: residual SS = 1.92e-07  
 Iteration 1: residual SS = 1.82e-08  
 Iteration 2: residual SS = 2.81e-09  
 Iteration 3: residual SS = 2.79e-09  
 Iteration 4: residual SS = 2.79e-09  
 Iteration 5: residual SS = 2.79e-09

| Source   | SS        | df  | MS         |                 |           |
|----------|-----------|-----|------------|-----------------|-----------|
| Model    | 5.929e-07 | 2   | 2.9645e-07 | Number of obs = | 433       |
| Residual | 2.789e-09 | 431 | 6.4720e-12 | R-squared =     | 0.9953    |
| Total    | 5.957e-07 | 433 | 1.3757e-09 | Adj R-squared = | 0.9953    |
|          |           |     |            | Root MSE =      | 2.54e-06  |
|          |           |     |            | Res. dev. =     | -9928.813 |

  

| chd_cif | Coef.    | Std. Err. | t      | P> t  | [95% Conf. Interval] |          |
|---------|----------|-----------|--------|-------|----------------------|----------|
| /lamb   | 5.22e-06 | 9.31e-08  | 56.04  | 0.000 | 5.03e-06             | 5.40e-06 |
| /rho    | 1.395373 | .0103113  | 135.32 | 0.000 | 1.375106             | 1.41564  |

**Figure S2: Statistical output of Weibull equation for stroke**

```
. nl (stroke_cif = 1- exp(-{lamb=0.0001}*sttime^{rho=1})) if sttime<7.85
(obs = 433)
```

```
Iteration 0: residual SS = 4.48e-08
Iteration 1: residual SS = 5.73e-09
Iteration 2: residual SS = 4.97e-09
Iteration 3: residual SS = 4.97e-09
Iteration 4: residual SS = 4.97e-09
Iteration 5: residual SS = 4.97e-09
```

| Source   | SS        | df  | MS         |                 |           |  |
|----------|-----------|-----|------------|-----------------|-----------|--|
| Model    | 9.878e-07 | 2   | 4.9390e-07 | Number of obs = | 433       |  |
| Residual | 4.965e-09 | 431 | 1.1520e-11 | R-squared =     | 0.9950    |  |
| Total    | 9.928e-07 | 433 | 2.2928e-09 | Adj R-squared = | 0.9950    |  |
|          |           |     |            | Root MSE =      | 3.39e-06  |  |
|          |           |     |            | Res. dev. =     | -9679.137 |  |

  

| stroke_cif | Coef.    | Std. Err. | t      | P> t  | [95% Conf. Interval] |          |
|------------|----------|-----------|--------|-------|----------------------|----------|
| /lamb      | .00001   | 1.56e-07  | 64.24  | 0.000 | 9.70e-06             | .0000103 |
| /rho       | 1.158394 | .0092365  | 125.41 | 0.000 | 1.140239             | 1.176548 |

**Figure S3: Statistical output of Weibull equation for overt nephropathy**

```
. nl (neph_cif = 1- exp(-{lamb=0.0001}*sttime^{rho=1})) if sttime < 7.85
(obs = 433)
```

```
Iteration 0: residual SS = 3.07e-07
Iteration 1: residual SS = 6.59e-08
Iteration 2: residual SS = 6.09e-08
Iteration 3: residual SS = 6.09e-08
Iteration 4: residual SS = 6.09e-08
Iteration 5: residual SS = 6.09e-08
```

| Source   | SS        | df  | MS         |                 |           |  |
|----------|-----------|-----|------------|-----------------|-----------|--|
| Model    | 5.874e-06 | 2   | 2.9371e-06 | Number of obs = | 433       |  |
| Residual | 6.086e-08 | 431 | 1.4121e-10 | R-squared =     | 0.9897    |  |
| Total    | 5.935e-06 | 433 | 1.3707e-08 | Adj R-squared = | 0.9897    |  |
|          |           |     |            | Root MSE =      | .0000119  |  |
|          |           |     |            | Res. dev. =     | -8593.993 |  |

  

| neph_cif | Coef.    | Std. Err. | t     | P> t  | [95% Conf. Interval] |          |
|----------|----------|-----------|-------|-------|----------------------|----------|
| /lamb    | .0000231 | 5.29e-07  | 43.62 | 0.000 | .0000221             | .0000241 |
| /rho     | 1.191976 | .0135456  | 88.00 | 0.000 | 1.165353             | 1.2186   |

**Figure S4: Statistical output of Weibull equation for non-CV mortality**

```
. nl (mort_cif = 1- exp(-{lamb=0.0001}*sttime^{rho=1})) if sttime<8.5
(obs = 444)
```

Iteration 0: residual SS = 3.42e-06  
Iteration 1: residual SS = 8.86e-07  
Iteration 2: residual SS = 6.00e-08  
Iteration 3: residual SS = 5.66e-08  
Iteration 4: residual SS = 5.52e-08  
Iteration 5: residual SS = 5.52e-08

| Source   | SS        | df  | MS         |                 |           |  |
|----------|-----------|-----|------------|-----------------|-----------|--|
| Model    | 5.449e-06 | 2   | 2.7246e-06 | Number of obs = | 444       |  |
| Residual | 5.522e-08 | 442 | 1.2493e-10 | R-squared =     | 0.9900    |  |
| Total    | 5.504e-06 | 444 | 1.2397e-08 | Adj R-squared = | 0.9899    |  |
|          |           |     |            | Root MSE =      | .0000112  |  |
|          |           |     |            | Res. dev. =     | -8866.649 |  |

  

| mort_cif | Coef.    | Std. Err. | t     | P> t  | [95% Conf. Interval] |          |
|----------|----------|-----------|-------|-------|----------------------|----------|
| /lamb    | .00001   | 2.99e-07  | 33.54 | 0.000 | 9.45e-06             | .0000106 |
| /rho     | 1.605988 | .0163584  | 98.18 | 0.000 | 1.573838             | 1.638138 |

**Figure S5: Statistical output of Weibull equation for retinopathy**

```
. nl (retino_cif = 1- exp(-{lamb=0.0001}*sttime^{rho=1})) if sttime<9.0
(obs = 445)
```

Iteration 0: residual SS = .0104453  
Iteration 1: residual SS = .0011583  
Iteration 2: residual SS = .0008264  
Iteration 3: residual SS = .0001127  
Iteration 4: residual SS = .0000908  
Iteration 5: residual SS = .0000907  
Iteration 6: residual SS = .0000907  
Iteration 7: residual SS = .0000907  
Iteration 8: residual SS = .0000907  
Iteration 9: residual SS = .0000907

| Source   | SS        | df  | MS         |                 |           |  |
|----------|-----------|-----|------------|-----------------|-----------|--|
| Model    | .01346512 | 2   | .00673256  | Number of obs = | 445       |  |
| Residual | .0000907  | 443 | 2.0474e-07 | R-squared =     | 0.9933    |  |
| Total    | .01355582 | 445 | .000030463 | Adj R-squared = | 0.9933    |  |
|          |           |     |            | Root MSE =      | .0004525  |  |
|          |           |     |            | Res. dev. =     | -5592.821 |  |

  

| retino_cif | Coef.    | Std. Err. | t      | P> t  | [95% Conf. Interval] |          |
|------------|----------|-----------|--------|-------|----------------------|----------|
| /lamb      | .001882  | .0000258  | 72.98  | 0.000 | .0018313             | .0019327 |
| /rho       | .8276945 | .0082764  | 100.01 | 0.000 | .8114286             | .8439604 |

For extrapolation beyond the end of follow-up, the regression coefficients (

Table **S1**) are multiplied by patient baseline characteristics and summed to a total. As the model simulation progresses, the multipliers assigned to certain coefficients vary, either with time (e.g. increase in age, years since diagnosis) or by treatment (e.g. treatment effect on risk factors, natural progression of disease). The total of the coefficients is then multiplied by the Weibull hazard at time,  $t$ , to determine the probability of experiencing complications in each model year (cycle).

**Table S1: Regression parameters**

| Parameter                                     | CHD coefficient | Stroke coefficient | Non-CV mortality coefficient | Overt nephropathy coefficient | Retinopathy coefficient |
|-----------------------------------------------|-----------------|--------------------|------------------------------|-------------------------------|-------------------------|
| Scale parameter (lambda)                      | 0.0000052       | 0.00001            | 0.0000                       | 0.00002                       | 0.00188                 |
| Lambda standard error                         | $9.31e^{-8}$    | $1.56e^{-7}$       | $2.99e^{-7}$                 | $5.29e^{-7}$                  | 0.0000258               |
| Shape parameter (rho)                         | 1.3954          | 1.1584             | 1.6060                       | 1.19198                       | 0.82769                 |
| Rho standard error                            | 0.0103113       | 0.0092365          | 0.0163584                    | 0.0135456                     | 0.0082764               |
| Sex (female=1, male=0) †                      | -0.862          | -0.801             | -0.616                       | 0.000                         | 0.000                   |
| Age in year/10 <sup>†</sup>                   | 0.330           | 0.434              | 0.890                        | 0.000                         | 0.139                   |
| HbA <sub>1c</sub> % <sup>†</sup>              | 0.200           | 0.200              | 0.000                        | 0.239                         | 0.282                   |
| Years after diagnosis <sup>†</sup>            | 0.000           | 0.000              | 0.000                        | 0.000                         | 0.049                   |
| BMI (<18.5 kg/m <sup>2</sup> ; yes=1, no=0) † | 0.000           | 0.000              | 1.089                        | 0.000                         | -0.392                  |
| BMI (>=25 kg/m <sup>2</sup> ; yes=1, no=0) †  | 0.000           | 0.000              | 0.171                        | 0.000                         | 0.202                   |
| SBP in mmHg/10 <sup>†</sup>                   | 0.124           | 0.146              | 0.000                        | 0.107                         | 0.000                   |
| Non-HDL-c in mmol/L <sup>†</sup>              | 0.445           | 0.320              | 0.000                        | 0.000                         | 0.000                   |
| Log (ACR in mg/mmol) †                        | 0.000           | 0.000              | 0.000                        | 1.143                         | 0.108                   |
| Smoker (no=0, current=1) †                    | 0.585           | 0.000              | 0.725                        | 0.805                         | 0.000                   |
| Exercise (no=0, yes=1) †                      | 0.000           | -0.633             | -0.590                       | 0.000                         | 0.000                   |
| Atrial fibrillation <sup>†</sup>              | 0.000           | 2.489              | 0.000                        | 1.769                         | 0.000                   |

Abbreviations: ACR, albumin-to-creatinine ratio; BMI, body mass index; CHD, coronary heart disease; CV, cardiovascular disease; HbA<sub>1c</sub>, glycated hemoglobin; JDCS, Japan Diabetes Complications Study; J-EDIT, Japanese Elderly Diabetes Intervention Trial; non-HDL-c, non-high density lipoprotein cholesterol; SBP, systolic blood pressure.

† The coefficients were obtained by fitting the corresponding models to the dataset from JDCS and J-EDIT.
